# Supplementary material for: Protein-protected red emittive copper nanoclusters as a fluorometric probe for highly sensitive biosensing of creatinine
Source: Royal Society of Chemistry journal article supplement (doi:10.1039/c8ay00827b), 2018-01-01
Supplement: c8ay00827b1.pdf [file c8ay00827b1.pdf]

## **Electronic Supporting information**

### **Protein protected red emissive copper nanoclusters as a fluorometric probe for highly sensitive biosensing of creatinine**

R. Rajamanikandan and M. Ilanchelian\*

Department of Chemistry,

Bharathiar University, Coimbatore - 641046, Tamil Nadu, India.

\*Corresponding author: E-mail: [chelian73@yahoo.com](mailto:chelian73@yahoo.com).

Tel: +91 422 2428317; Fax: +91 - 422 2422 387

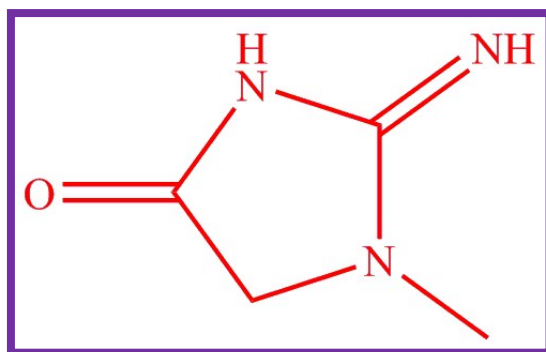

**Scheme S1.** Chemical structure of creatinine

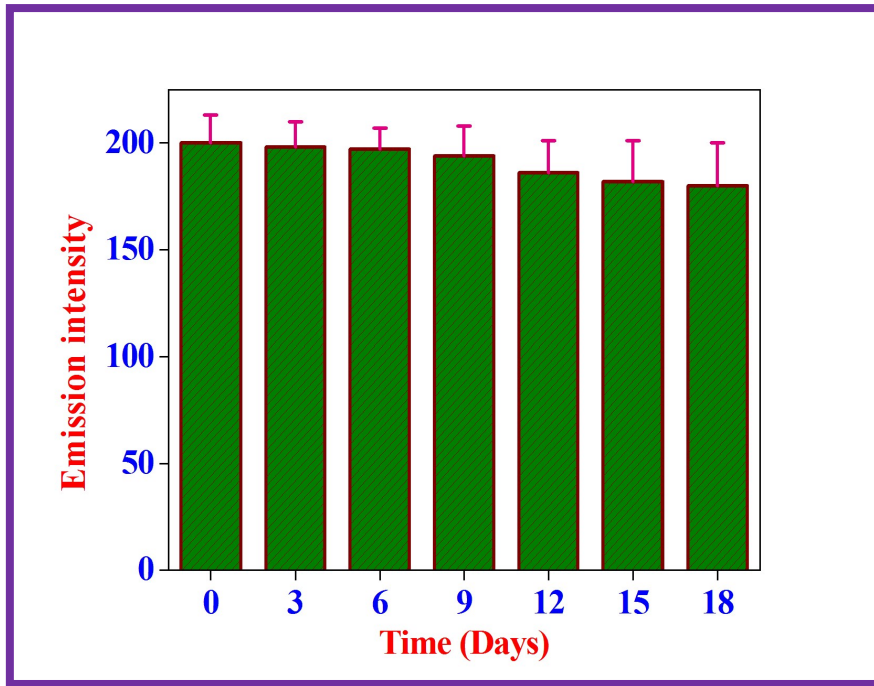

**Fig. S1.** Emission intensity value of BSA-CuNCs in different time (1-18 days) intervals

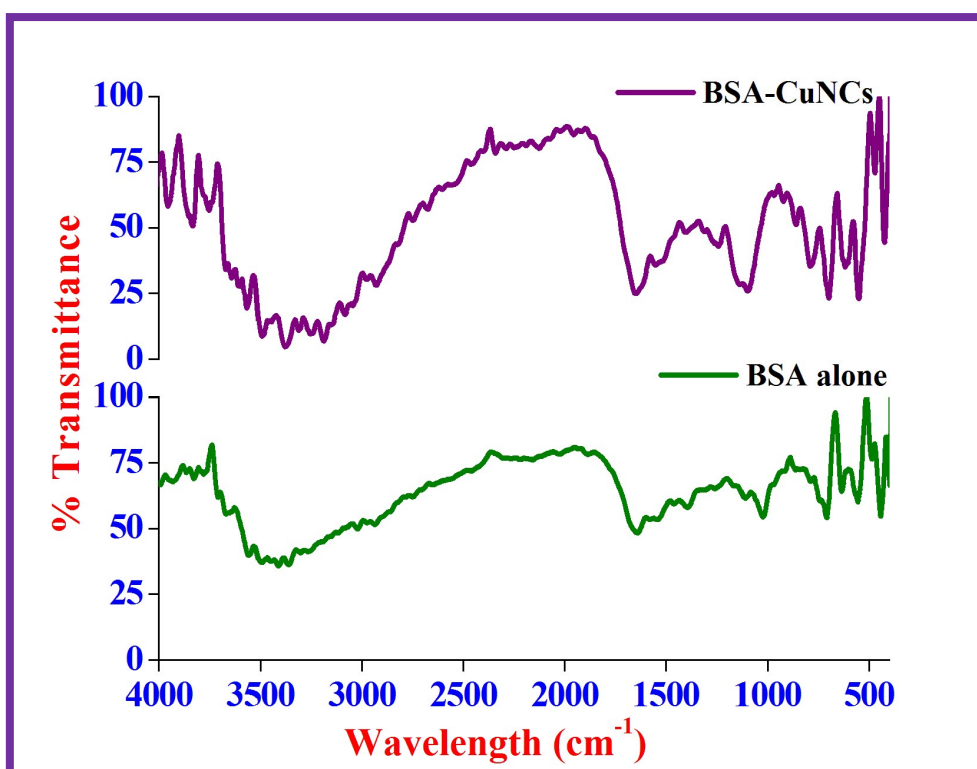

**Fig. S2.** FT-IR spectra of BSA alone and BSA-CuNCs

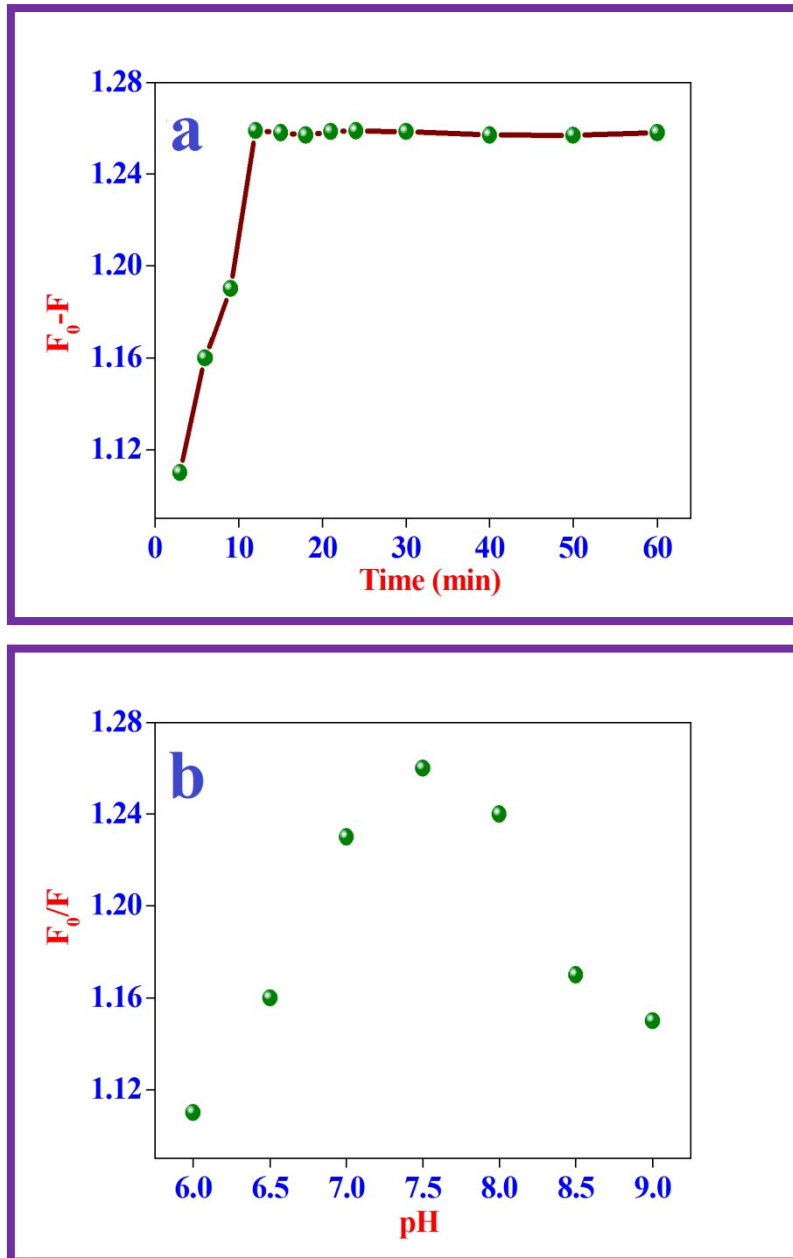

**Fig. S3.** Effect of time (a) and pH (b) on the BSA-CuNCs in the presence ( $10 \times 10^{-6} \text{ mol dm}^{-3}$ ) of creatinine.

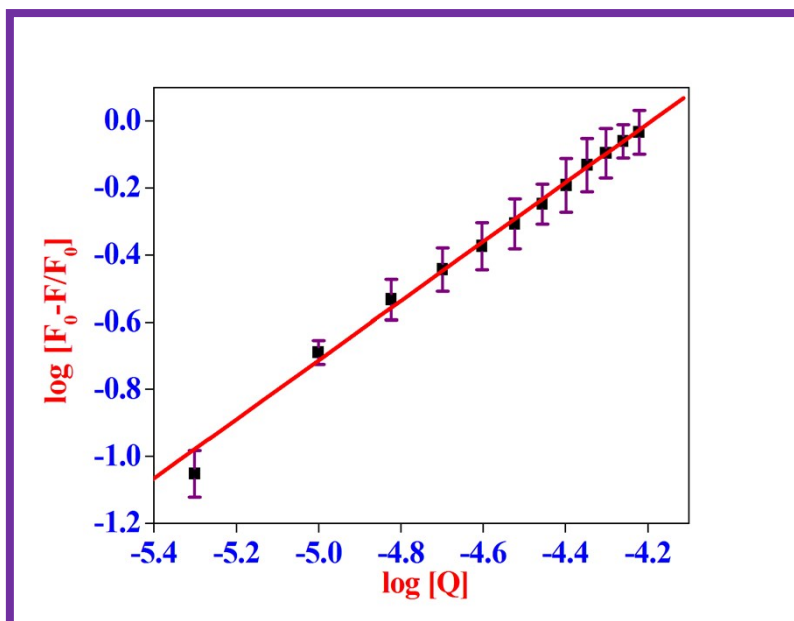

**Fig. S4.** Double logarithmic plot for BSA-CuNCs in the presence of various concentrations of creatinine

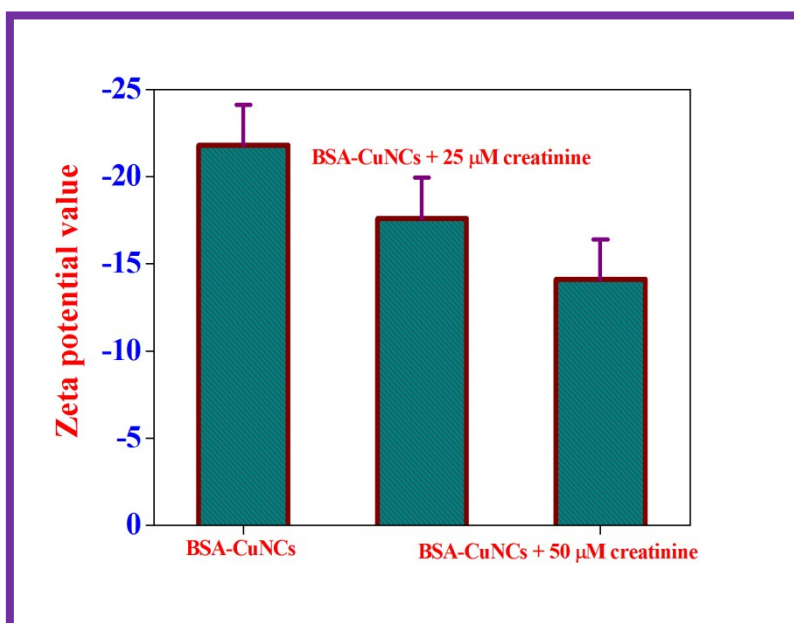

**Fig. S5.** Zeta potential data of BSA-CuNCs in the presence of various amounts of creatinine

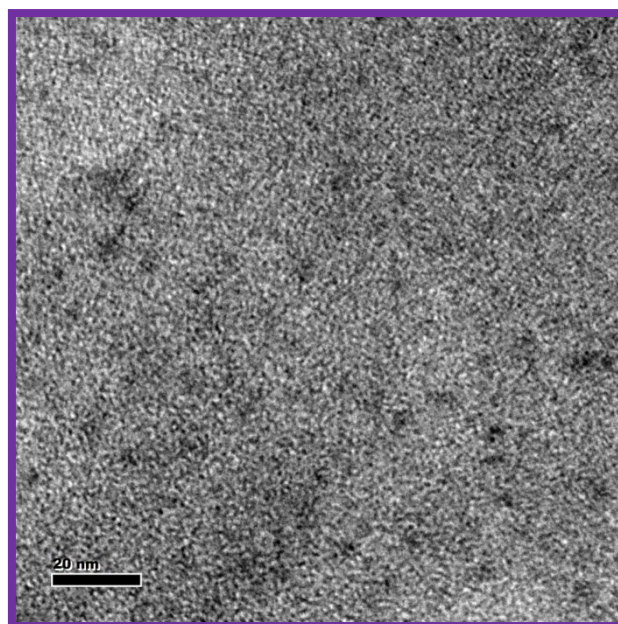

**Fig. S6.** HR-TEM images of BSA-CuNCs after the addition ( $50 \times 10^{-6} \text{ mol dm}^{-3}$ ) of creatinine

**Table S1.** Comparison of present fluorimetric methodology with other analytical approaches for creatinine biosensor

| Method                              | Linear range                         | Detection limit     | References       |
|-------------------------------------|--------------------------------------|---------------------|------------------|
| Jaffe's based method                | 0-6 mM                               | 0.72 mM             | 57               |
| Surface enhanced Raman spectroscopy | ---                                  | 0.88 mM             | 58               |
| Capillary zone electrophoresis      | ---                                  | 0.05 mM             | 59               |
| Chemiluminescence                   | 0.1-30 $\mu\text{M}$                 | 0.072 $\mu\text{M}$ | 60               |
| Amperometric                        | 1-150 $\mu\text{M}$                  | 0.3 $\mu\text{M}$   | 61               |
| Electroanalytical method            | 1-80 $\mu\text{M}$                   | 380 nM              | 62               |
| Colorimetry                         | 10-1000 $\mu\text{M}$                | 1.21 $\mu\text{M}$  | 63               |
| Colorimetry                         | 0.1-20 mM                            | 80 $\mu\text{M}$    | 64               |
| Colorimetry                         | 0.01-1 $\mu\text{M}$                 | 8.4 nM              | 65               |
| Fluorimetric                        | 20-520 $\mu\text{M}$                 | 2 nM                | 66               |
| <b>Fluorimetric</b>                 | <b>5-60 <math>\mu\text{M}</math></b> | <b>50 nM</b>        | <b>This work</b> |

mM- Milli molar  
 $\mu\text{M}$ -Micro molar  
nM-Nano molar
